# Supplementary material for: Macrophage innate training induced by IL-4 and IL-13 activation enhances OXPHOS driven anti-mycobacterial responses
Source: eLife. 2022 Sep 29;11:e74690. doi: 10.7554/eLife.74690 (PMC9555863; doi:10.7554/eLife.74690)
Supplement: Source data 1. — Raw data, calculations and results of statistical analyses for all included figures. [file elife-74690-data1.xlsx]

## Sheet: Fig 1B
Representative experiment Day 0
Mouse	Condition	Dilution	CFU count, lysed cells	´ Dilution	Concentration (CFU/ml)	Total Intracellular CFU	CFU/cell	Rep Mean	Condition Mean	Condition STD	Condition SEM		Mouse	Condition	´ Dilution	CFU count, lysed cells	´ Dilution	Concentration (CFU/ml)	Total Intracellular CFU	CFU/cell	Rep Mean	Condition Mean	Condition STD	Condition SEM	P-Value (vs Media)	95% Confidence Interval		Mouse	Condition	Dilution	CFU count, lysed cells	´ Dilution	Concentration (CFU/ml)	Total Intracellular CFU	CFU/cell	Rep Mean	Condition Mean	Condition STD	Condition SEM	P-Value (vs Media)	95% Confidence Interval
Mouse 1	Media I	10^2						1.66	2.4825	1.01075	0.505376		Mouse 1	IL-4/13 I	10^2						4.34	4.06	1.40728	0.703642	0.1659	-0.8703 to 4.025		Mouse 1	IFNγ/LPS I	10^2						4.58	2.975	1.2551	0.62755	0.6156	-1.784 to 2.769
		10^3	83	83000	1660000	830000	1.66								10^3	104	104000	2080000	1040000	2.08										10^3	88	88000	1760000	880000	1.76
		10^4													10^4	33	330000	6600000	3300000	6.6										10^4	37	370000	7400000	3700000	7.4
		10^5													10^5															10^5
		10^6													10^6															10^6
	Media II	10^2						1.94						IL-4/13 II	10^2						4.07								IFNγ/LPS II	10^2						1.82
		10^3	97	97000	1940000	970000	1.94								10^3	107	107000	2140000	1070000	2.14										10^3	91	91000	1820000	910000	1.82
		10^4													10^4	30	300000	6000000	3000000	6										10^4
		10^5													10^5															10^5
		10^6													10^6															10^6
Mouse 2	Media I	10^2						2.12					Mouse 2	IL-4/13 I	10^2						1.94							Mouse 2	IFNγ/LPS I	10^2						3.82
		10^3	106	106000	2120000	1060000	2.12								10^3	97	97000	1940000	970000	1.94										10^3	82	82000	1640000	820000	1.64
		10^4													10^4															10^4	30	300000	6000000	3000000	6
		10^5													10^5															10^5
		10^6													10^6															10^6
	Media II	10^2						4.21						IL-4/13 II	10^2						5.89								IFNγ/LPS II	10^2						1.68
		10^3	101	101000	2020000	1010000	2.02								10^3	109	109000	2180000	1090000	2.18										10^3	84	84000	1680000	840000	1.68
		10^4	32	320000	6400000	3200000	6.4								10^4	48	480000	9600000	4800000	9.6										10^4
		10^5													10^5															10^5
		10^6													10^6															10^6
Representative experiment Day 6
Mouse	Condition	Dilution	CFU count, lysed cells	´ Dilution	Concentration (CFU/ml)	Total Intracellular CFU	CFU/cell	Rep Mean	Condition Mean	Condition STD	Condition SEM		Mouse	Condition	Dilution	CFU count, lysed cells	´ Dilution	Concentration (CFU/ml)	Total Intracellular CFU	CFU/cell	Rep Mean	Condition Mean	Condition STD	Condition SEM	P-Value (vs Media)	95% Confidence Interval
Mouse 1	Media I	10^2						1.8	1.65	0.119024	0.0595119		Mouse 1	IL-4/13 I	10^2						4.17	3.3525	0.970525	0.485262	0.0235	0.3211 to 3.084
		10^3	54	54000	1080000	540000	1.8								10^3	87	87000	1740000	870000	1.74
		10^4													10^4	33	330000	6600000	3300000	6.6
		10^5													10^5
		10^6													10^6
	Media II	10^2						1.53333						IL-4/13 II	10^2						3.67
		10^3	46	46000	920000	460000	1.53333								10^3	67	67000	1340000	670000	1.34
		10^4													10^4	30	300000	6000000	3000000	6
		10^5													10^5
		10^6													10^6
Mouse 2	Media I	10^2						1.53333					Mouse 2	IL-4/13 I	10^2						3.87
		10^3	46	46000	920000	460000	1.53333								10^3	77	77000	1540000	770000	1.54
		10^4													10^4	31	310000	6200000	3100000	6.2
		10^5													10^5
		10^6													10^6
	Media II	10^2						1.73333						IL-4/13 II	10^2						1.7
		10^3	52	52000	1040000	520000	1.73333								10^3	85	85000	1700000	850000	1.7
		10^4													10^4
		10^5													10^5
		10^6													10^6
Time	Condition	Cell Counts	Concentration (10^6 cells/ml)	Well concentration, 10^6 cells/ml	~Cells/well
Day 5	Media	23	2.3	0.306667	0.3*10^6
		28	2.8	0.373333
		19	1.9	0.253333
	IL-4/13	35	3.5	0.466667	0.5*10^6
		48	4.8	0.64
		38	3.8	0.506667

## Sheet: Fig 1C
Representative experiment Day 0
Time	Mouse	Condition	Dilution	CFU count, lysed cells	x Dilution	Concentration (CFU/ml)	Rep Mean (CFU/ml)	Total Intracellular CFU	Mouse Mean CFU	Killed: (Mouse Mean CFU 3h - CFU 3h)	Mouse Mean Killed	Condition Mean	Condition STD	Condition SEM		Time	Mouse	Condition	Dilution	CFU count, lysed cells	x Dilution	Concentration (CFU/ml)	Rep Mean (CFU/ml)	Total Intracellular CFU	Killed: (Mouse Mean CFU 3h - CFU 27h)*	Condition Mean Killed	Condition STD	Condition SEM	P-value (vs Media)			Time	Mouse	Condition	Dilution	CFU count, lysed cells	x Dilution	Concentration (CFU/ml)	Rep Mean (CFU/ml)	Total Intracellular CFU	Killed: (Mouse Mean CFU 3h - CFU 51h)*	Condition Mean Killed	Condition STD	Condition SEM	P-value (vs Media)
3 Hours	Mouse 1	Media I	10^2				3830000	1915000	1442500	-472500	0	0	0	0		27 Hours	Mouse 1	Media I	10^2				1400000	700000	742500	535000	149896	74947.9				51 Hours	Mouse 1	Media I	10^2				2160000	1080000	362500	206250	209258	104629
			10^3	83	83000	1660000													10^3	70	70000	1400000													10^3	108	108000	2160000
			10^4	30	300000	6000000													10^4																10^4
			10^5																10^5																10^5
			10^6																10^6																10^6
		Media II	10^2				1940000	970000		472500								Media II	10^2				2080000	1040000	402500									Media II	10^2				1960000	980000	462500
			10^3	97	97000	1940000													10^3	104	104000	2080000													10^3	98	98000	1960000
			10^4																10^4																10^4
			10^5																10^5																10^5
			10^6																10^6																10^6
	Mouse 2	Media I	10^2				2120000	1060000	1582500	522500	0						Mouse 2	Media I	10^2				1940000	970000	612500								Mouse 2	Media I	10^2				19400000	9700000	0
			10^3	106	106000	2120000													10^3	97	97000	1940000													10^3
			10^4																10^4																10^4	97	970000	19400000
			10^5																10^5																10^5
			10^6																10^6																10^6
		Media II	10^2				4210000	2105000		-522500								Media II	10^2				2400000	1200000	382500									Media II	10^2				17000000	8500000	0
			10^3	101	101000	2020000													10^3	120	120000	2400000													10^3
			10^4	32	320000	6400000													10^4																10^4	85	850000	17000000
			10^5																10^5																10^5
			10^6																10^6																10^6
	Mouse 1	IL-4/13 I	10^2				4340000	2170000	2102500	-67500	0	0	0	0			Mouse 1	IL-4/13 I	10^2				2280000	1140000	962500	465000	465568	232784	0.749439				Mouse 1	IL-4/13 I	10^2				2500000	1250000	852500	213125	369143	184572	0.974939
			10^3	104	104000	2080000													10^3	114	114000	2280000													10^3	125	125000	2500000
			10^4	33	330000	6600000													10^4																10^4
			10^5																10^5																10^5
			10^6																10^6																10^6
		IL-4/13 II	10^2				4070000	2035000		67500								IL-4/13 II	10^2				4090000	2045000	0									IL-4/13 II	10^2				4480000	2240000	0
			10^3	107	107000	2140000													10^3	99	99000	1980000													10^3	128	128000	2560000
			10^4	30	300000	6000000													10^4	31	310000	6200000													10^4	32	320000	6400000
			10^5																10^5																10^5
			10^6																10^6																10^6
	Mouse 2	IL-4/13 I	10^2				1940000	970000	1957500	987500	0						Mouse 2	IL-4/13 I	10^2				4180000	2090000	0								Mouse 2	IL-4/13 I	10^2				4150000	2075000	0
			10^3	97	97000	1940000													10^3	108	108000	2160000													10^3	115	115000	2300000
			10^4																10^4	31	310000	6200000													10^4	30	300000	6000000
			10^5																10^5																10^5
			10^6																10^6																10^6
		IL-4/13 II	10^2				5890000	2945000		-987500								IL-4/13 II	10^2				2120000	1060000	897500									IL-4/13 II	10^2				4620000	2310000	0
			10^3	109	109000	2180000													10^3	106	106000	2120000													10^3	132	132000	2640000
			10^4	48	480000	9600000													10^4																10^4	33	330000	6600000
			10^5																10^5																10^5
			10^6																10^6																10^6
	Mouse 1	IFNγ/LPS I	10^2				4580000	2290000	1600000	-690000	0	0	0	0			Mouse 1	IFNγ/LPS I	10^2				1140000	570000	1030000	962500	89057.6	44528.8	0.002418				Mouse 1	IFNγ/LPS I	10^2				940000	470000	1130000	1065500	193838	96919.1	1e-06
			10^3	88	88000	1760000													10^3	57	57000	1140000													10^3	47	47000	940000
			10^4	37	370000	7400000													10^4																10^4
			10^5																10^5																10^5
			10^6																10^6																10^6
		IFNγ/LPS II	10^2				1820000	910000		690000								IFNγ/LPS II	10^2				1080000	540000	1060000									IFNγ/LPS II	10^2	176	17600	352000	496000	248000	1352000
			10^3	91	91000	1820000													10^3	54	54000	1080000													10^3	32	32000	640000
			10^4																10^4																10^4
			10^5																10^5																10^5
			10^6																10^6																10^6
	Mouse 2	IFNγ/LPS I	10^2				3820000	1910000	1375000	-535000	0						Mouse 2	IFNγ/LPS I	10^2				900000	450000	925000								Mouse 2	IFNγ/LPS I	10^2				900000	450000	925000
			10^3	82	82000	1640000													10^3	45	45000	900000													10^3	45	45000	900000
			10^4	30	300000	6000000													10^4																10^4
			10^5																10^5																10^5
			10^6																10^6																10^6
		IFNγ/LPS II	10^2				1680000	840000		535000								IFNγ/LPS II	10^2				1080000	540000	835000									IFNγ/LPS II	10^2				1040000	520000	855000
			10^3	84	84000	1680000													10^3	54	54000	1080000													10^3	52	52000	1040000
			10^4																10^4																10^4
			10^5																10^5																10^5
			10^6																10^6																10^6
																									*Negative values were changed to 0															*Negative values were changed to 0
Representative experiment Day 6
Time	Mouse	Condition	Dilution	CFU count, lysed cells	x Dilution	Concentration (CFU/ml)	Rep Mean (CFU/ml)	Total Intracellular CFU	Mouse Mean CFU	Killed: (Mouse Mean CFU 3h - CFU 3h)	Mouse Mean Killed	Condition Mean	Condition STD	Condition SEM		Time	Mouse	Condition	Dilution	CFU count, lysed cells	x Dilution	Concentration (CFU/ml)	Rep Mean (CFU/ml)	Total Intracellular CFU	Killed BCG: (mean CFU 3h - CFU 27h)	Standardised to 0.5 * 10^6 cells	Condition Mean Killed	Condition STD	Condition SEM	P-Value (vs Media)			Time	Mouse	Condition	Dilution	CFU count, lysed cells	x Dilution	Concentration (CFU/ml)	Rep Mean (CFU/ml)	Total Intracellular CFU	Killed BCG: (mean CFU 3h - CFU 51h)	Standardised to 0.5 ´ 10^6 cells	Condition Mean Killed	Condition STD	Condition SEM	P-Value (vs Media)
3 Hours	Mouse 1	Media I	10^2				1080000	540000	500000	-40000	0	0	0	0		27 Hours	Mouse 1	Media I	10^2				600000	300000	200000	333333	445833	214209	107104				51 Hours	Mouse 1	Media I	10^2				820000	410000	90000	150000	241667	62915.3	31457.6
			10^3	54	54000	1080000													10^3	30	30000	600000														10^3	41	41000	820000
			10^4																10^4																	10^4
			10^5																10^5																	10^5
			10^6																10^6																	10^6
		Media II	10^2				920000	460000		40000								Media II	10^2				620000	310000	190000	316667									Media II	10^2				640000	320000	180000	300000
			10^3	46	46000	920000													10^3	31	31000	620000														10^3	32	32000	640000
			10^4																10^4																	10^4
			10^5																10^5																	10^5
			10^6																10^6																	10^6
	Mouse 2	Media I	10^2				920000	460000	490000	30000							Mouse 2	Media I	10^2				0	0	490000	816667								Mouse 2	Media I	10^2				720000	360000	130000	216667
			10^3	46	46000	920000													10^3	0	0	0														10^3	36	36000	720000
			10^4																10^4																	10^4
			10^5																10^5																	10^5
			10^6																10^6																	10^6
		Media II	10^2				1040000	520000		-30000								Media II	10^2				600000	300000	190000	316667									Media II	10^2				620000	310000	180000	300000
			10^3	52	52000	1040000													10^3	30	30000	600000														10^3	31	31000	620000
			10^4																10^4																	10^4
			10^5																10^5																	10^5
			10^6																10^6																	10^6
	Mouse 1	IL-4/13 I	10^2				4170000	2085000	1960000	-125000	0	0	0	0			Mouse 1	IL-4/13 I	10^2				1240000	620000	1340000	1340000	1088750	247894	123947	0.000302				Mouse 1	IL-4/13 I	10^2				1780000	890000	1070000	1070000	906250	223834	111917	0.000302
			10^3	87	87000	1740000													10^3	62	62000	1240000														10^3	89	89000	1780000
			10^4	33	330000	6600000													10^4																	10^4
			10^5																10^5																	10^5
			10^6																10^6																	10^6
		IL-4/13 II	10^2				3670000	1835000		125000								IL-4/13 II	10^2				1260000	630000	1330000	1330000									IL-4/13 II	10^2				1600000	800000	1160000	1160000
			10^3	67	67000	1340000													10^3	63	63000	1260000														10^3	80	80000	1600000
			10^4	30	300000	6000000													10^4																	10^4
			10^5																10^5																	10^5
			10^6																10^6																	10^6
	Mouse 2	IL-4/13 I	10^2				3870000	1935000	1392500	-542500							Mouse 2	IL-4/13 I	10^2				1020000	510000	882500	882500								Mouse 2	IL-4/13 I	10^2				1180000	590000	802500	802500
			10^3	77	77000	1540000													10^3	51	51000	1020000														10^3	59	59000	1180000
			10^4	31	310000	6200000													10^4																	10^4
			10^5																10^5																	10^5
			10^6																10^6																	10^6
		IL-4/13 II	10^2				1700000	850000		542500								IL-4/13 II	10^2				1180000	590000	802500	802500									IL-4/13 II	10^2				1600000	800000	592500	592500
			10^3	85	85000	1700000													10^3	59	59000	1180000														10^3	80	80000	1600000
			10^4																10^4																	10^4
			10^5																10^5																	10^5
			10^6																10^6																	10^6
Time	Condition	Cell Counts	Concentration (10^6 cells/ml)	Well concentration, 10^6 cells/ml	~Cells/well
Day 5	Media	23	2.3	0.306667	0.3*10^6
		28	2.8	0.373333
		19	1.9	0.253333
	IL-4/13	35	3.5	0.466667	0.5*10^6
		48	4.8	0.64
		38	3.8	0.506667

## Sheet: Fig 1D
Representative experiment Day 6
TNFα
Condition Day -1	Time point post infection	Repeat	TNFα, pg/ml				Rep Mean	Rep STD	Time point Mean	Time point STD
Media Control	0 h	1	0	0	0	0	0	0	0	0
		2	0	0	0	0	0	0
	3 h	1	0	0	0	0	0	0	0	0
		2	0	0	0	0	0	0
	27 h	1	448.333	398.333	442.333	495.667	446.167	34.4879	478.458	32.2917
		2	437.667	495	576.667	533.667	510.75	51.1356
	51 h	1	460.333	376.667	573.333	569.333	494.917	81.9544	567.125	72.2083
		2	578.333	583	712.667	683.333	639.333	59.5991
IL-4/13	0 h	1	0	0	0	0	0	0	0	0
		2	0	0	0	0	0	0
	3 h	1	0	0	0	0	0	0	0	0
		2	0	0	0	0	0	0
	27 h	1	613.333	617.667	590.333	597	604.583	11.2728	591.917	12.6667
		2	602	578.333	555.667	581	579.25	16.4137
	51 h	1	516	527	811.667	753.667	652.083	132.241	682.458	30.375
		2	781.667	815.333	626	628.333	712.833	86.4936
IL-10
Condition Day -1	Time point post infection	Repeat	IL-10, pg/ml				Rep Mean	Rep STD	Time point Mean	Time point STD
Media Control	0 h	1	0	0	26	46	18	19.3391	9	9
		2	0	0	0	0	0	0
	3 h	1	0	0	23.5	28	12.875	12.9729	27.6042	14.7292
		2	23	32	55	40	42.3333	9.53357
	27 h	1	160	158.5	258	240.5	204.25	45.4265	199.292	4.95834
		2	224.333	241	152	160	194.333	38.8866
	51 h	1	398	406	376.5	358.5	384.75	18.6028	371.208	13.5417
		2	377.333	325.333	355	373	357.667	20.46
IL-4/13	0 h	1	0	0	0	0	0	0	0	0
		2	0	0	0	0	0	0
	3 h	1	0	0	23.5	0	5.875	10.1758	2.9375	2.9375
		2	0	0	0	0	0	0
	27 h	1	0	0	0	0	0	0	11.375	11.375
		2	0	0	43.6667	47.3333	22.75	22.7869
	51 h	1	0	23	56.5	45	31.125	21.6286	82.625	51.5
		2	145	138	128	125.5	134.125	7.82923
Time	Condition	Cell Counts	Concentration (10^6 cells/ml)	Well concentration, 10^6 cells/ml	~Cells/well
Day 5	Media	23	2.3	0.306667	0.3*10^6
		28	2.8	0.373333
		19	1.9	0.253333
	IL-4/13	35	3.5	0.466667	0.5*10^6
		48	4.8	0.64
		38	3.8	0.506667
Standardized TNFα
Condition Day -1	Time point post infection	Repeat	TNFα, pg/ml				Rep Mean	Rep STD	Time point Mean	Time point STD	P-value (vs Media Control)
Media Control	0 h	1	0	0	0	0	0	0	0	0
		2	0	0	0	0	0	0
	3 h	1	0	0	0	0	0	0	0	0
		2	0	0	0	0	0	0
	27 h	1	747.222	663.889	737.222	826.111	743.611	57.4799	797.431	53.8194
		2	729.444	825	961.111	889.444	851.25	85.2261
	51 h	1	767.222	627.778	955.556	948.889	824.861	136.591	945.208	120.347
		2	963.889	971.667	1187.78	1138.89	1065.56	99.3319
IL-4/13	0 h	1	0	0	0	0	0	0	0	0
		2	0	0	0	0	0	0
	3 h	1	0	0	0	0	0	0	0	0
		2	0	0	0	0	0	0
	27 h	1	613.333	617.667	590.333	597	604.583	11.2728	591.917	12.6667	0.048499
		2	602	578.333	555.667	581	579.25	16.4137
	51 h	1	516	527	811.667	753.667	652.083	132.241	682.458	30.375	0.018899
		2	781.667	815.333	626	628.333	712.833	86.4936
Standardized IL-10
Condition Day -1	Time point post infection	Repeat	IL-10, pg/ml				Rep Mean	Rep STD	Time point Mean	Time point STD	P-Value (vs Media Control per time point)
Media Control	0 h	1	0	0	43.3333	76.6667	14.4444	20.4275	7.22222	7.22222
		2	0	0	0	0	0	0
	3 h	1	0	0	39.1667	46.6667	13.0556	18.4633	37.0833	24.0278
		2	38.3333	53.3333	91.6667	66.6667	61.1111	22.4571
	27 h	1	266.667	264.167	430	400.833	340.417	75.7108	332.153	8.2639
		2	373.889	401.667	253.333	266.667	323.889	64.811
	51 h	1	663.333	676.667	627.5	597.5	641.25	31.0046	618.681	22.5695
		2	628.889	542.222	591.667	621.667	596.111	34.1
IL-4/13	0 h	1	0	0	0	0	0	0	0	0
		2	0	0	0	0	0	0
	3 h	1	0	0	23.5	0	7.83333	11.078	3.91667	3.91667
		2	0	0	0	0	0	0
	27 h	1	0	0	0	0	0	0	11.375	11.375	3.9e-05
		2	0	0	43.6667	47.3333	22.75	22.7869
	51 h	1	0	23	56.5	45	31.125	21.6286	82.625	51.5	<0.000001
		2	145	138	128	125.5	134.125	7.82923

## Sheet: Fig 2A
TNFα
Condition Day -1	Stimulus Day 6	Repeat	TNFα, pg/ml			Rep Mean	Rep STD	Condition Mean	Condition STD	P-value (vs media control)	95% Confidence Interval
Media Control	Media	1	655	757.5	655	689.167	48.319	741.944	39.7232
		2	820	847.5	587.5	751.667	116.625
		3	892.5	890	572.5	785	150.264
IL-4/13		1	472.5	730	567.5	590	106.321	608.333	56.6176	0.1536	-213.9 to 48.07
		2	647.5	735	672.5	685	36.799
		3	607.5	550	492.5	550	46.9486
IFNγ/LPS		1	669.333	592	656	639.111	33.7544	510.944	92.1892	0.0751	-482.9 to 36.07
		2	538.667	320	544	467.556	104.36
		3	442	438.5	398	426.167	19.968
Media Control	Mtb	1	4187.5	3575	4185	3982.5	288.148	4563.98	448.786
		2	4700	4821.67	4381.67	4634.44	185.514
		3	4810	3957.5	6457.5	5075	1037.68
IL-4/13		1	6422.5	7295	6145	6620.83	489.984	6941.06	244.972	0.0028	1373 to 3381
		2	6922	7260	7465	7215.67	223.884
		3	7507.5	6865	6587.5	6986.67	385.316
IFNγ/LPS		1	4993.5	5313	7539	5948.5	1132.19	5994.24	308.566	0.0206	361.0 to 2500
		2	5026	5302.5	6595.33	5641.28	683.998
		3	5213	7539.5	6426.33	6392.94	950.083
IL-6
Condition Day -1	Stimulus Day 6	Repeat	IL-6, pg/ml			Rep Mean	Rep STD	Condition Mean	Condition STD	P-value (vs media control)	95% Confidence Interval
Media Control	Media	1	0	0	0	0	0	0	0
		2	0	0	0	0	0
		3	0	0	0	0	0
IL-4/13		1	0	0	0	0	0	0	0
		2	0	0	0	0	0
		3	0	0	0	0	0
IFNγ/LPS		1	0	0	0	0	0	0	0
		2	0	0	0	0	0
		3	0	0	0	0	0
Media Control	Mtb	1	4574.44	3643.84	5269.56	4495.95	666.013	5172.62	695.266
		2	4917.75	5007.12	4754.61	4893.16	104.543
		3	6434.23	6054.05	5898	6128.76	225.2
IL-4/13		1	11512.8	11331.2	12362.6	11735.5	449.524	12230.5	485.623	0.0003	5393 to 8723
		2	11922.8	12454.8	11819.2	12065.6	278.411
		3	12952.7	12947	12771.1	12890.3	84.293
IFNγ/LPS		1	6730.25	6266.92	6646.5	6547.89	201.598	4678.83	1356.47	0.6706	-3486 to 2499
		2	3966.24	4260.42	4128.76	4118.47	120.318
		3	2702.63	3514.62	3893.16	3370.14	496.652
IL-10
Condition Day -1	Stimulus Day 6	Repeat	IL-10, pg/ml			Rep Mean	Rep STD	Condition Mean	Condition STD	P-value (vs media control)	95% Confidence Interval
Media Control	Media	1	0	0	0	0	0	0	0
		2	0	0	0	0	0
		3	0	0	0	0	0
IL-4/13		1	0	0	0	0	0	0	0
		2	0	0	0	0	0
		3	0	0	0	0	0
IFNγ/LPS		1	0	0	0	0	0	0	0
		2	0	0	0	0	0
		3	0	0	0	0	0
Media Control	Mtb	1	324.667	374.667	345.333	348.222	20.5144	329.37	18.1331
		2	305.667	310.333	298.667	304.889	4.79452
		3	336.667	331.333	337	335	2.59632
IL-4/13		1	137.667	131.333	128	132.333	4.00927	123.009	10.6452	0.0002	-247.6 to -165.1
		2	106.333	103.667	114.333	108.111	4.53244
		3	140.25	123.25	122.25	128.583	8.25967
IFNγ/LPS		1	64.5	111.333	81	85.6111	19.3956	79.7963	12.2334	<0.0001	-292.5 to -206.5
		2	73.6667	58	56.6667	62.7778	7.71882
		3	109	96	68	91	17.1075

## Sheet: Fig 2B
TNFα
Condition Day -1	Stimulus Day 6	Repeat	TNFα, pg/ml			Rep Mean	Rep STD	Condition Mean	Condition STD	P-value (vs media control)	95% Confidence Interval
Media Control	Media	1	378.667	405.333	360	381.333	18.6031	462.63	89.4557
		2	392.333	442.333	423.333	419.333	20.6074
		3	621.667	608.333	531.667	587.222	39.659
IL-4/13		1	401.667	410.667	395.333	402.556	6.29131	457.889	64.7734	0.9545	-221.6 to 212.1
		2	455.333	449	362.667	422.333	42.2698
		3	557.333	608.333	480.667	548.778	52.4696
Media Control	PAM3CSK4	1	1423.33	1661.67	1528.33	1537.78	97.5284	1837.78	377.729
		2	1475	1601.67	1738.33	1605	107.531
		3	2523.33	2288.33	2300	2370.56	108.135
IL-4/13		1	5345	5521.67	5923.33	5596.67	241.986	6350.93	1276.42	0.0087	1900 to 7126
		2	5305	5468.33	5150	5307.78	129.974
		3	8383.33	8165	7896.67	8148.33	199.03
Media Control	LPS	1	1851.67	2085	1843.33	1926.67	112.01	1987.96	141.738
		2	1965	1825	1770	1853.33	82.0907
		3	2435	2080	2036.67	2183.89	178.441
IL-4/13		1	3063.33	3408.33	3023.33	3165	172.836	2865.74	224.154	0.0094	357.1 to 1398
		2	3063.33	2125	2688.33	2625.56	385.636
		3	2988.33	2743.33	2688.33	2806.67	130.405
Media Control	Poly I:C	1	988.333	1130	1123.33	1080.56	65.2677	1359.81	262.116
		2	1351.67	1258.33	1255	1288.33	44.8043
		3	1530	1835	1766.67	1710.56	130.684
IL-4/13		1	856.667	745	806.667	802.778	45.6706	913.519	126.849	0.0961	-1018 to 125.4
		2	910	846.667	783.333	846.667	51.7115
		3	960	1201.67	1111.67	1091.11	99.7251
Media Control	CpG	1	1213.33	1076.67	870	1053.33	141.133	1236.11	164.824
		2	1168.33	1228.33	1210	1202.22	25.1048
		3	1441.67	1550	1366.67	1452.78	75.2566
IL-4/13		1	1340	1323.33	980	1214.44	165.917	1649.26	353.597	0.2086	-352.8 to 1179
		2	1631.67	1826.67	1500	1652.78	134.194
		3	2240	2241.67	1760	2080.56	226.668
Media Control	R848	1	966.667	978.333	1086.67	1010.56	54.0292	1248.15	239.244
		2	1240	1193.33	1041.67	1158.33	84.6669
		3	1621.67	1665	1440	1575.56	97.4712
IL-4/13		1	6716.67	6951.67	6691.67	6786.67	117.118	6655.74	679.268	0.0015	3632 to 7737
		2	6288.33	5638.33	5371.67	5766.11	384.98
		3	8006.67	7095	7141.67	7414.44	419.198
IL-10
Condition Day -1	Stimulus Day 6	Repeat	IL-10, pg/ml			Rep Mean	Rep STD	Condition Mean	Condition STD	P-value (vs media control)	95% Confidence Interval
Media Control	Media	1	0	0	0	0	0	0	0
		2	0	0	0	0	0
		3	0	0	0	0	0
IL-4/13		1	0	0	0	0	0	0	0
		2	0	0	0	0	0
		3	0	0	0	0	0
Media Control	PAM3CSK4	1	1227	1214.5	1196	1212.5	12.7345	1370.11	386.624
		2	974	970.5	1042	995.5	32.9115
		3	1879	1898	1930	1902.33	21.0449
IL-4/13		1	1018	913.5	990	973.833	44.167	1291.39	442.391	0.8589	-1232 to 1075
		2	1036	1021.5	892.5	983.333	64.5011
		3	1930	2000	1821	1917	73.6523
Media Control	LPS	1	843.5	845.5	690	793	72.8366	945.444	265.627
		2	779.5	714.5	679	724.333	41.614
		3	1399	1265	1293	1319	57.7119
IL-4/13		1	271	284	288.5	281.167	7.41994	466.944	132.569	0.0848	-1061 to 104.3
		2	545	611	458	538	62.6578
		3	590	564	591	581.667	12.4989
Media Control	Poly I:C	1	298.5	301.5	252	284	22.6605	400.556	109.968
		2	315	393	401	369.667	38.7929
		3	575	575	494	548	38.1838
IL-4/13		1	0	0	0	0	0	43.0556	32.5924	0.0116	-582.1 to -132.2
		2	93	84.5	59	78.8333	14.4472
		3	27	72	52	50.3333	18.4089
Media Control	CpG	1	2808	2898	2659	2788.33	98.5574	2741.67	326.366
		2	2199	2498	2265	2320.67	128.256
		3	2898	2265	4185	3116	798.85
IL-4/13		1	949.5	1065.5	956.5	990.5	53.1099	1268	323.015	0.0105	-2375 to -572.2
		2	1097.5	1162.5	1017.5	1092.5	59.3015
		3	1717	1680	1766	1721	35.2231
Media Control	R848	1	2745.5	2888.5	2704.5	2779.5	78.8712	2868.33	700.179
		2	1976.5	2238	1961.5	2058.67	126.956
		3	2888.5	4393	4019	3766.83	639.568
IL-4/13		1	810.5	799	799	802.833	5.42115	1101.94	291.587	0.0301	-3255 to -277.3
		2	984	1171	862	1005.67	127.076
		3	1558	1493	1441	1497.33	47.8632

## Sheet: Fig 2C
Arginase-1 (Arg1)
Condition Day -1	Stimulus Day 6	Repeat	Arg1 fold change (β-Act)	Arg1 fold change (TATAbp)	Rep Mean	Condition Mean	Condition STD	P-value (vs media control)	95% Confidence Interval
Media Control	Media	1	1	1	1	1	0
		2	1	1	1
		3	1	1	1
		4	1	1	1
IL-4/13		1	25.7854	18.4458	22.1156	16.2975	5.65603	0.0034	7.307 to 23.29
		2	19.3333	24.2442	21.7888
		3	10.3934	11.0131	10.7032
		4	10.3635	10.8012	10.5824
IFNγ/LPS		1	6.29677	18.9033	12.6	8.60587	2.95547	0.0043	3.431 to 11.78
		2	4.6466	15.2369	9.94174
		3	1.98143	7.45217	4.7168
		4	4.39066	9.93911	7.16488
Media Control	Mtb	1	3.39929	10.8642	7.13173	4.57593	2.01782
		2	2.12168	9.75119	5.93644
		3	1.13831	4.7822	2.96025
		4	1.11261	3.43799	2.2753
IL-4/13		1	3.391	6.77369	5.08234	4.42384	1.35397	0.9172	-3.585 to 3.281
		2	1.94479	10.6992	6.32202
		3	1.07927	5.44786	3.26357
		4	1.29277	4.76205	3.02741
IFNγ/LPS		1	131.924	288.611	210.268	182.383	48.7434	0.0007	108.9 to 246.7
		2	91.0184	399.939	245.479
		3	68.8447	239.76	154.302
		4	96.2835	142.681	119.482
Inducible nitric oxide synthase (iNOS)
Condition Day -1	Stimulus Day 6	Repeat	Nos2 fold change (β-Act)	Nos2 fold change (TATAbp)	Rep Mean	Condition Mean	Condition STD	P-value (vs media control)	95% Confidence Interval
Media Control	Media	1	1	1	1	1	0
		2	1	1	1
		3	1	1	1
		4	1	1	1
IL-4/13		1	20.1783	14.4347	17.3065	20.0851	11.9488	0.0326	2.205 to 35.97
		2	33.3798	41.8587	37.6192
		3	4.01248	4.25172	4.1321
		4	20.8426	21.7228	21.2827
IFNγ/LPS		1	384.14	1153.22	768.678	602.647	308.904	0.015	165.3 to 1038
		2	214.163	702.271	458.217
		3	77.2045	290.366	183.785
		4	612.746	1387.07	999.908
Media Control	Mtb	1	25.2308	80.638	52.9344	43.1299	11.1767
		2	14.9433	68.6788	41.8111
		3	9.75286	40.973	25.3629
		4	25.6289	79.1937	52.4113
IL-4/13		1	589.357	898.096	743.726	567.656	227.769	0.0073	202.4 to 846.7
		2	420.324	1245	832.66
		3	187.035	372.938	279.987
		4	332.544	495.957	414.25
IFNγ/LPS		1	2814.99	6158.35	4486.67	4630.78	1016.5	0.0002	3152 to 6024
		2	2178.88	9574.11	5876.49
		3	1379.38	4803.84	3091.61
		4	4084.28	6052.43	5068.36

## Sheet: Fig 2D
Nitric oxide (NO)
Condition Day -1	Stimulus Day 6	Repeat	Nitrite ion (nitric oxide [NO]), μM			Rep Mean	Rep STD	Condition Mean NO, μM	STD	P-value (vs media control)	95% Confidence Interval
Media Control	Media	1	0	0	0	0	0	0	0
		2	0	0	0	0	0
		3	0	0	0	0	0
IL-4/13		1	0	0	0	0	0	0	0
		2	0	0	0	0	0
		3	0	0	0	0	0
IFNγ/LPS		1	11.452	5.7778	7.004	8.07793	2.43778	11.879	2.85126	0.0061	5.212 to 16.67
		2	16.3333	13.056	15.446	14.9451	1.38404
		3	4.8886	15.776	17.177	12.6139	5.49245
Media Control	LPS	1	0	0	0	0	0	3.00184	2.13115
		2	2.9666	4.887	4.955	4.26953	0.921731
		3	6.6557	2.9933	4.559	4.736	1.5004
IL-4/13		1	11.4445	8.655	13.3436	11.1477	1.92558	11.7955	2.81072	0.0243	1.871 to 15.71
		2	13.6721	17.3422	15.533	15.5158	1.49836
		3	5.9254	12.4124	7.8311	8.72297	2.72236
IFNγ/LPS		1	13.331	17.0422	17.842	16.0717	1.9653	18.8143	1.97265	0.0015	10.11 to 21.50
		2	17.778	21.4331	22.6734	20.6282	2.07801
		3	19.1143	21.3365	18.7778	19.7429	1.13521

## Sheet: Fig 2E
CD80
Condition Day -1	Stimulus Day 6	Repeat	CD80 MFI	Mean	STD	P-Value (vs Media Control)	95% Confidence Interval
Media Control	Media	1	256	253.667	29.8478
		2	289
		3	216
IL-4/13		1	524	571.333	34.1012	0.0006	228.7 to 406.6
		2	603
		3	587
Media Control	Mtb	1	233	235.667	11.5854
		2	251
		3	223
IL-4/13		1	425	489.667	48.5547	0.002	156.0 to 352.0
		2	542
		3	502
Media Control	PAM3CSK4	1	262	249	13.7356
		2	255
		3	230
IL-4/13		1	339	404.333	46.9136	0.0109	59.36 to 251.3
		2	447
		3	427
CD206
Condition Day -1	Stimulus Day 6	Repeat	CD206 MFI	Mean	STD	P-Value (vs Media Control)	95% Confidence Interval
Media Control	Media	1	753	821.333	48.8148
		2	847
		3	864
IL-4/13		1	832	761	52.9213	0.3016	-201.7 to 81.01
		2	705
		3	746
Media Control	Mtb	1	462	426	33.6749
		2	435
		3	381
IL-4/13		1	585	582.333	42.4997	0.0151	49.88 to 262.8
		2	529
		3	633
Media Control	PAM3CSK4	1	430	377.333	39.4659
		2	335
		3	367
IL-4/13		1	625	603.333	31.3511	0.0032	127.0 to 325.0
		2	559
		3	626
Major histocompatibility complex class II (MHC II)
Condition Day -1	Stimulus Day 6	Repeat	MHC II MFI	Mean	STD	P-Value (vs Media Control)	95% Confidence Interval
Media Control	Media	1	113	108.733	9.0116
		2	96.2
		3	117
IL-4/13		1	540	489.667	58.2657	0.0008	265.2 to 496.7
		2	408
		3	521
Media Control	Mtb	1	220	205.333	12.7105
		2	189
		3	207
IL-4/13		1	1090	1226	192.333	0.0017	642.2 to 1399
		2	1090
		3	1498
Media Control	PAM3CSK4	1	191	188.333	14.0079
		2	170
		3	204
IL-4/13		1	2456	2372	190.746	<0.0001	1808 to 2559
		2	2108
		3	2552

## Sheet: Fig 3A
Oxygen Comsumption Rate (OCR), pmol/min
			Media OCR																IL-4/13 OCR																		IFNγ/LPS OCR
Inhibitor	Time, minutes		Mouse 1		Mean	STD	Mouse 2		Mean	STD	Mouse 3			Mean	STD	Media Mean	Media STD		Mouse 1			Mean	STD	Mouse 2			Mean	STD	Mouse 3			Mean	STD	IL-4/13 Mean	IL-4/13 STD		Mouse 1			Mean	STD	Mouse 2			Mean	STD	Mouse 3
	1.30988		91.7858	102.158	96.9721	5.18628	69.2246	85.9814	77.603	8.37842	72.3809	64.8077	56.9821	64.7236	6.28681	79.7662	13.254		148.106	146.715	140.593	145.138	3.26361	126.723	128.637	108.349	121.236	9.14623	80.7698	108.102	106.821	98.564	12.5933	121.646	19.0159		39.9407	37.7238	39.2099	38.9581	0.922391	41.5341	37.4614	43.0607	40.6854	2.36334	33.9834	42.4128	42.364
	7.76751		82.4912	96.2938	89.3925	6.9013	65.6511	81.5713	73.6112	7.96013	69.096	61.9314	55.8066	62.278	5.43088	75.0939	11.119		138.131	135.296	134.749	136.059	1.48228	117.447	119.004	101.173	112.541	8.06345	76.654	103.125	99.8665	93.215	11.7857	113.938	17.5187		38.1311	35.398	36.662	36.7304	1.11686	39.6479	37.535	42.9986	40.0605	2.24949	32.3357	39.3886	40.1446
	14.2335		80.2484	94.5916	87.42	7.1716	66.0583	80.0932	73.0758	7.01748	67.4049	60.8908	55.2639	61.1865	4.96098	73.8941	10.7254		135.241	133.005	132.162	133.469	1.29912	113.888	116.612	99.423	109.974	7.54339	76.7952	102.73	98.372	92.6325	11.3391	112.025	16.7345		37.7899	34.7774	36.2914	36.2862	1.22983	39.6003	37.1751	43.7703	40.1819	2.72371	33.7633	40.9072	40.8684
Oligomycin	20.7907		36.7623	40.2611	38.5117	1.74938	27.8396	39.7054	33.7725	5.93286	30.1426	23.9109	26.1523	26.7353	2.57725	33.0065	4.83813		61.1354	60.3963	62.8389	61.4569	1.02278	52.5429	52.8157	97.7354	67.698	21.2399	34.4047	49.5292	48.3699	44.1013	6.8728	57.752	9.98318		33.4161	31.2109	32.5366	32.3878	0.906383	36.1877	33.3335	42.3839	37.3017	3.77785	32.3623	35.59	35.7931
	27.2519		35.3564	40.2052	37.7808	2.42438	27.7955	35.2549	31.5252	3.72969	29.1467	25.0552	24.907	26.3696	1.96459	31.8919	4.66581		58.4401	56.6704	61.3746	58.8284	1.94002	49.821	51.2359	95.9139	65.6569	21.4027	33.1557	46.9263	44.7681	41.6167	6.04735	55.3673	10.1149		33.4617	31.125	33.2195	32.6021	1.04912	36.2566	33.9769	42.5643	37.5993	3.63207	31.9179	35.1552	35.4524
	33.7158		33.4394	38.0811	35.7603	2.32082	29.2084	34.3921	31.8003	2.59185	28.163	23.1947	24.8124	25.39	2.069	30.9835	4.27284		57.2557	55.0046	60.1481	57.4694	2.10527	48.7972	49.297	94.243	64.1124	21.3065	31.5569	45.2198	42.9609	39.9125	5.97988	53.8315	10.209		32.6236	30.6718	32.5185	31.938	0.896357	36.4905	34.3581	41.8376	37.562	3.14611	31.6201	34.7198	34.3791
FCCP	40.2808		86.5755	87.6636	87.1196	0.544042	55.3085	61.7805	58.5445	3.23596	85.0744	84.0318	76.8323	81.9795	3.66441	75.8812	12.4372		129.846	119.466	117.31	122.208	5.47276	127.326	123.862	168.594	139.928	20.3199	85.0878	109.573	130.294	108.318	18.4766	123.484	12.936		32.4078	29.2923	30.2964	30.6655	1.29838	32.6155	30.1376	39.1294	33.9608	3.79213	30.5476	31.5172	32.9232
	46.7502		86.9541	78.7983	82.8762	4.07792	54.334	60.4259	57.38	3.04597	75.2043	66.9144	69.7797	70.6328	3.43766	70.2963	10.4115		111.407	108.629	105.634	108.557	2.35745	105.24	102.089	151.173	119.501	22.4329	73.2241	97.7575	108.773	93.2515	14.8584	107.103	10.7654		31.8333	29.5761	30.9475	30.7856	0.928594	32.9332	30.7014	38.8594	34.1646	3.44244	24.5651	24.2564	25.8573
	53.2198		84.7923	78.2746	81.5335	3.25885	56.4833	62.1878	59.3356	2.85227	68.0541	60.0191	63.4937	63.8556	3.29027	68.2415	9.57824		112.171	107.699	104.428	108.099	3.17378	102.553	102.366	145.78	116.9	20.4215	65.4261	88.8621	95.1214	83.1366	12.7812	102.712	14.3005		30.6825	28.9779	30.0735	29.9113	0.705286	33.4267	30.1383	37.7493	33.7715	3.11673	21.8676	21.5094	22.4449
Rotenone &	59.7803		23.197	24.4266	23.8118	0.614791	17.266	22.3435	19.8048	2.53877	15.6229	10.473	13.8318	13.3092	2.13467	18.9753	4.32759		33.3146	29.2702	34.3912	32.3254	2.20455	24.967	27.4976	23.3568	25.2738	1.70431	12.3538	25.8302	24.1726	20.7855	6.00044	26.1282	4.7497		27.8899	25.9306	26.6305	26.817	0.810665	30.578	28.0211	33.7261	30.7751	2.33321	18.4725	19.268	18.0124
Antimycin-A	66.2546		20.929	23.0434	21.9862	1.05722	15.807	20.2795	18.0432	2.23624	15.4438	11.7286	14.9006	14.0243	1.63841	18.0179	3.25045		32.46	29.4007	34.3516	32.0708	2.03984	25.0192	27.2244	23.5919	25.2785	1.49423	15.2699	25.833	24.3148	21.8059	4.66301	26.3851	4.26304		27.4839	24.9105	26.06	26.1514	1.05256	30.363	28.0351	33.7195	30.7059	2.33329	17.2528	19.3714	17.0498
	72.725		19.6283	20.5948	20.1116	0.483262	15.4895	19.349	17.4192	1.92972	17.9228	13.221	18.4301	16.5246	2.34517	18.0185	1.52443		31.5455	28.269	34.4338	31.4161	2.51841	24.9358	25.9916	24.516	25.1478	0.620808	16.4775	26.2272	23.788	22.1642	4.14259	26.2427	3.85559		26.9087	25.3708	26.5242	26.2679	0.653485	30.8101	28.2199	33.5454	30.8584	2.17441	16.7481	19.2826	17.1851
Extracellular Acidification Rate (ECAR), mpH/min
			Media ECAR																IL-4/13 ECAR																		IFNγ/LPS ECAR
Inhibitor	Time, minutes		Mouse 1		Mean	STD	Mouse 2		Mean	STD	Mouse 3			Mean	STD	Media Mean	Media STD		Mouse 1			Mean	STD	Mouse 2			Mean	STD	Mouse 3			Mean	STD	IL-4/13 Mean	IL-4/13 STD		Mouse 1			Mean	STD	Mouse 2			Mean	STD	Mouse 3
	1.30988		4.3839	6.52164	5.45277	1.06887	4.80099	5.36982	5.0854	0.284417	12.0828	12.3689	10.3343	11.5953	0.899292	7.37784	2.98599		15.1943	14.5299	16.4193	15.3811	0.782568	10.6173	13.21	9.13062	10.986	1.68568	14.3915	23.6629	23.8793	20.6446	4.42244	15.6706	3.94842		34.864	36.8538	37.4529	36.3902	1.10656	33.5945	35.3827	32.1888	33.722	1.30701	48.9319	56.0035	56.2644
	7.76751		4.10021	6.79257	5.44639	1.34618	4.92613	5.32781	5.12697	0.200842	14.1189	13.8067	11.3302	13.0853	1.24755	7.8862	3.67859		15.9827	14.1086	16.2019	15.4311	0.939401	10.7749	12.5839	8.74747	10.7021	1.56706	15.164	23.9129	24.7006	21.2592	4.32192	15.7974	4.31771		34.1387	36.0343	37.2586	35.8105	1.28347	33.5311	35.1816	32.509	33.7406	1.10109	45.4121	51.768	51.3762
	14.2335		4.01149	6.99811	5.5048	1.49331	5.0044	5.49626	5.25033	0.245928	14.0616	13.6166	11.7142	13.1308	1.01806	7.96197	3.65638		15.5088	13.9038	16.7647	15.3924	1.17084	10.758	12.2624	8.65197	10.5575	1.48076	15.3206	23.6346	25.0408	21.332	4.28927	15.7606	4.40639		33.7569	35.2087	36.9241	35.2966	1.29446	33.8915	35.8084	32.6838	34.1279	1.28653	44.5265	50.2716	49.7905
Oligomycin	20.7907		3.01914	6.34258	4.68086	1.66172	4.23225	4.26049	4.24637	0.0141235	17.1718	14.3591	15.4769	15.6693	1.15631	8.19884	5.28538		20.8863	16.4164	17.9762	18.4263	1.85238	12.0257	13.9782	9.29679	11.7669	1.9199	18.1827	33.8694	31.7466	27.9329	6.94871	19.3754	6.63378		35.251	37.1613	38.3596	36.9239	1.28014	33.9375	35.9193	33.6195	34.4921	1.01748	45.5309	58.5742	58.799
	27.2519		6.46022	11.2977	8.87896	2.41873	7.62291	7.06602	7.34446	0.278445	27.379	24.456	22.9998	24.9449	1.82091	13.7228	7.95994		33.9919	29.3301	33.6105	32.3109	2.11344	22.0706	25.0553	9.37938	18.8351	6.79633	30.5872	47.2603	46.6549	41.5008	7.72105	30.8822	9.3082		34.8268	36.8207	38.7949	36.8142	1.61996	35.1458	37.4089	34.242	35.5989	1.33198	46.0149	53.6728	52.9753
	33.7158		9.28016	15.4792	12.3797	3.09953	9.61334	9.70363	9.65848	0.045141	30.9654	28.6857	25.8731	28.5081	2.0827	16.8487	8.3189		37.4706	33.2918	38.7312	36.4979	2.3247	26.1453	29.2273	9.3	21.5575	8.75823	33.5121	49.5057	49.2251	44.081	7.47421	34.0455	9.35725		35.6901	37.0686	39.7959	37.5182	1.70608	35.4166	37.4839	33.9557	35.6187	1.44745	47.0028	53.4381	52.7034
FCCP	40.2808		16.0443	23.2359	19.6401	3.59578	14.1995	16.0375	15.1185	0.91896	37.5292	33.9432	32.2077	34.56	2.21588	23.1062	8.30678		46.7547	43.1366	49.7919	46.5611	2.72047	36.2724	35.9345	24.6952	32.3007	5.37966	32.4963	50.3113	55.5999	46.1358	9.88332	41.6659	6.62445		37.9529	38.1067	39.4807	38.5134	0.686824	34.7731	37.4303	32.5983	34.9339	1.97595	45.398	59.7317	62.3079
	46.7502		14.648	20.8881	17.7681	3.12004	13.5139	15.3367	14.4253	0.911417	34.6853	32.3227	21.0483	29.3521	5.95036	20.5151	6.39594		43.1606	40.4288	46.6688	43.4194	2.55405	32.4093	34.3649	20.8349	29.203	5.97078	35.8137	52.1985	57.6891	48.5671	9.29245	40.3965	8.18923		36.517	38.1197	39.7332	38.1233	1.31301	34.8204	36.5624	33.5859	34.9895	1.22103	42.727	52.8037	52.7808
	53.2198		15.2472	21.3027	18.275	3.02775	14.1527	15.6829	14.9178	0.765092	32.115	31.1388	9.84665	24.3668	10.275	19.1865	3.91103		43.5898	40.6435	47.135	43.7895	2.6539	32.6619	35.3106	19.7915	29.2547	6.77827	35.2157	49.8604	55.3421	46.8061	8.49566	39.9501	7.66241		35.9454	38.0222	40.0849	38.0175	1.68993	35.2134	37.2478	33.846	35.4357	1.39764	42.2028	49.8839	48.9358
Rotenone &	59.7803		12.4491	19.3432	15.8961	3.44706	11.5791	13.4056	12.4924	0.913295	20.3232	17.6951	11.392	16.4701	3.7476	14.9529	1.75554		41.6218	38.5556	43.7307	41.3027	2.12472	29.6575	32.6004	19.0212	27.093	5.83273	-6.896563*	36.2572	39.6764	37.9668	1.70962	35.4542	6.06706		36.3823	37.8912	39.8491	38.0408	1.41926	34.1345	35.5894	33.2493	34.3244	0.964737	47.8232	61.6886	60.8575
Antimycin-A	66.2546		13.3849	19.9513	16.6681	3.28319	12.4725	14.6099	13.5412	1.0687	15.3618	14.5062	16.3709	15.413	0.762131	15.2074	1.2848		42.5296	39.3938	44.1876	42.037	1.98782	30.8682	33.3935	21.5928	28.6181	5.07353	10.2703	31.0567	34.1828	25.1699	10.6127	31.9417	7.27592		36.246	37.9174	39.6218	37.9284	1.37818	35.0222	36.3783	34.0774	35.1593	0.944326	44.9043	50.185	50.7644
	72.725		13.941	20.1721	17.0565	3.11555	12.5599	14.6532	13.6066	1.04665	17.01	16.6119	20.4896	18.0372	1.74176	16.2334	1.90012		42.8148	39.3676	45.3641	42.5155	2.45723	31.7744	34.1943	23.1903	29.7197	4.72145	21.421	31.3185	33.6005	28.78	5.28635	33.6717	6.26524		36.7258	38.6305	40.7772	38.7112	1.65497	35.7844	37.1975	34.3032	35.7617	1.1817	45.7504	47.7981	48.7531
*negative values were excluded
[truncated: 4 more columns]

## Sheet: Fig 3B
Lactate dehydrogenase (LDH)
Condition Day -1	Stimulus Day 6	Repeat	Ldha fold change (TATAbp)	Mean	STD	P-Value (vs Media Control)	95% Confidence Interval
Media Control	Mtb	1	4.60013	6.91886	1.64123
		2	7.98837
		3	8.16807
IL-4/13		1	0.237649	0.987361	1.08258	0.013	-9.791 to -2.072
		2	0.206182
		3	2.51825
IFNγ/LPS		1	5.67417	9.53464	2.80914	0.319	-3.772 to 9.003
		2	12.277
		3	10.6528
Pyruvate kinase isozyme M2 (PKM2)
Condition Day -1	Stimulus Day 6	Repeat	Pkm2 fold change (TATAbp)	Mean	STD	P-Value (vs Media Control)	95% Confidence Interval
Media Control	Mtb	1	1.22514	1.28271	0.136436
		2	1.15201
		3	1.47099
IL-4/13		1	0.676896	0.799161	0.129403	0.022	-0.8527 to -0.1144
		2	0.74237
		3	0.978219
IFNγ/LPS		1	4.05366	4.02476	0.294663	0.0003	2.105 to 3.380
		2	4.37033
		3	3.6503
Succinate dehydrogenase (SDH)
Condition Day -1	Stimulus Day 6	Repeat	Sdha fold change (TATAbp)	Mean	STD	P-Value (vs Media Control)	95% Confidence Interval
Media Control	Mtb	1	1.19454	1.29913	0.295944
		2	1.00046
		3	1.70238
IL-4/13		1	1.60991	1.76657	0.244323	0.1601	-0.2860 to 1.221
		2	2.11161
		3	1.5782
IFNγ/LPS		1	0.347868	0.343491	0.155965	0.0156	-1.612 to -0.2989
		2	0.532282
		3	0.150322
Myelocytomatosis viral oncogen (c-Myc)
Condition Day -1	Stimulus Day 6	Repeat	Myc fold change (TATAbp)	Mean	STD	P-Value (vs Media Control)	95% Confidence Interval
Media Control	Mtb	1	6.89701	8.87289	1.79132
		2	8.48784
		3	11.2338
IL-4/13		1	2.88499	3.54826	1.14344	0.0239	-9.497 to -1.152
		2	2.60269
		3	5.1571
IFNγ/LPS		1	0.238109	0.300957	0.0474623	0.0025	-12.09 to -5.054
		2	0.311969
		3	0.352793

[truncated: 43 more sheets: Fig 3C, Fig 3D, Fig 3E, Fig 3F, Fig 3G, Fig 4A, Fig 4B, Fig 6A, Fig 6B, Fig 6C, Fig 6D, Fig 6F, Fig 6G, Fig 7, Fig 1 Fig Sup1A, Fig 1 Fig Sup 1B, Fig 2 Fig Sup 1B, Fig 2 Fig Sup 1C, Fig 2 Fig Sup 1D, Fig 2 Fig Sup 1E …]
