# Supplementary material for: Macrophage innate training induced by IL-4 and IL-13 activation enhances OXPHOS driven anti-mycobacterial responses
Source: eLife journal article supplement (doi:10.7554/elife.74690), 2022-09-29

#### Acquisition Information

| # | Image ID   | Acquire Time         | Channels | Integration Times | Analysis | Image Name | Comment | Image Modifications |
|---|------------|----------------------|----------|-------------------|----------|------------|---------|---------------------|
| 1 | 0003288_01 | 15-May-2022 18:32:21 | 700      | 10:00             | Manual   | 0003288_01 |         |                     |

#### Image Display Values

| Channel | Color                       | Minimum   | Maximum | K |
|---------|-----------------------------|-----------|---------|---|
| 700     | Gray Scale (Black on White) | 0.0000416 | 0.0206  | 0 |

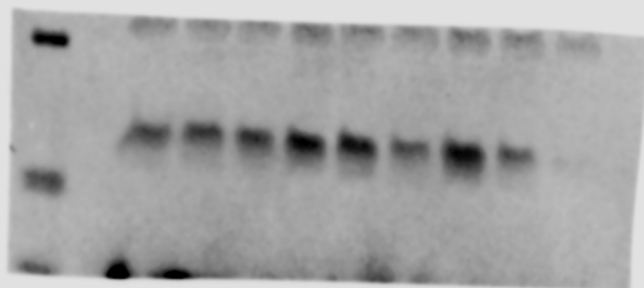

Supplement: supp [file elife-74690-supp-v1.zip]
