# Supplementary material for: Macrophage innate training induced by IL-4 and IL-13 activation enhances OXPHOS driven anti-mycobacterial responses
Source: eLife journal article supplement (doi:10.7554/elife.74690), 2022-09-29

Acquisition Information

| # | Image ID   | Acquire Time         | Channels | Integration Times | Analysis | Image Name | Comment | Image Modifications |
|---|------------|----------------------|----------|-------------------|----------|------------|---------|---------------------|
| 1 | 0003286_01 | 15-May-2022 17:40:07 | 700 800  | 10:00 10:00       | Manual   | 0003286_01 |         |                     |

Image Display Values

| Channel | Color                       | Minimum  | Maximum | K |
|---------|-----------------------------|----------|---------|---|
| 700     | Gray Scale (Black on White) | 0.000264 | 0.0571  | 0 |

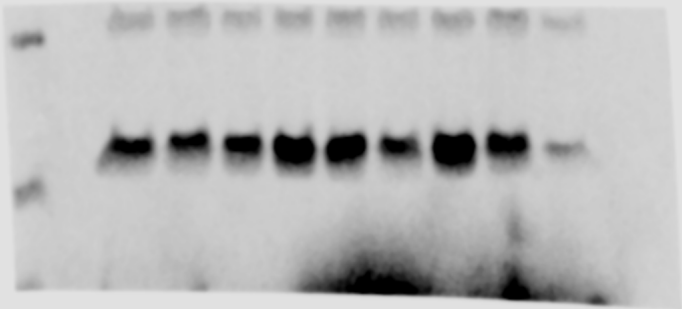

Supplement: supp [file elife-74690-supp-v1.zip]
