# Supplementary figures and images for: Macrophage innate training induced by IL-4 and IL-13 activation enhances OXPHOS driven anti-mycobacterial responses
Source: eLife journal article supplement (doi:10.7554/elife.74690), 2022-09-29

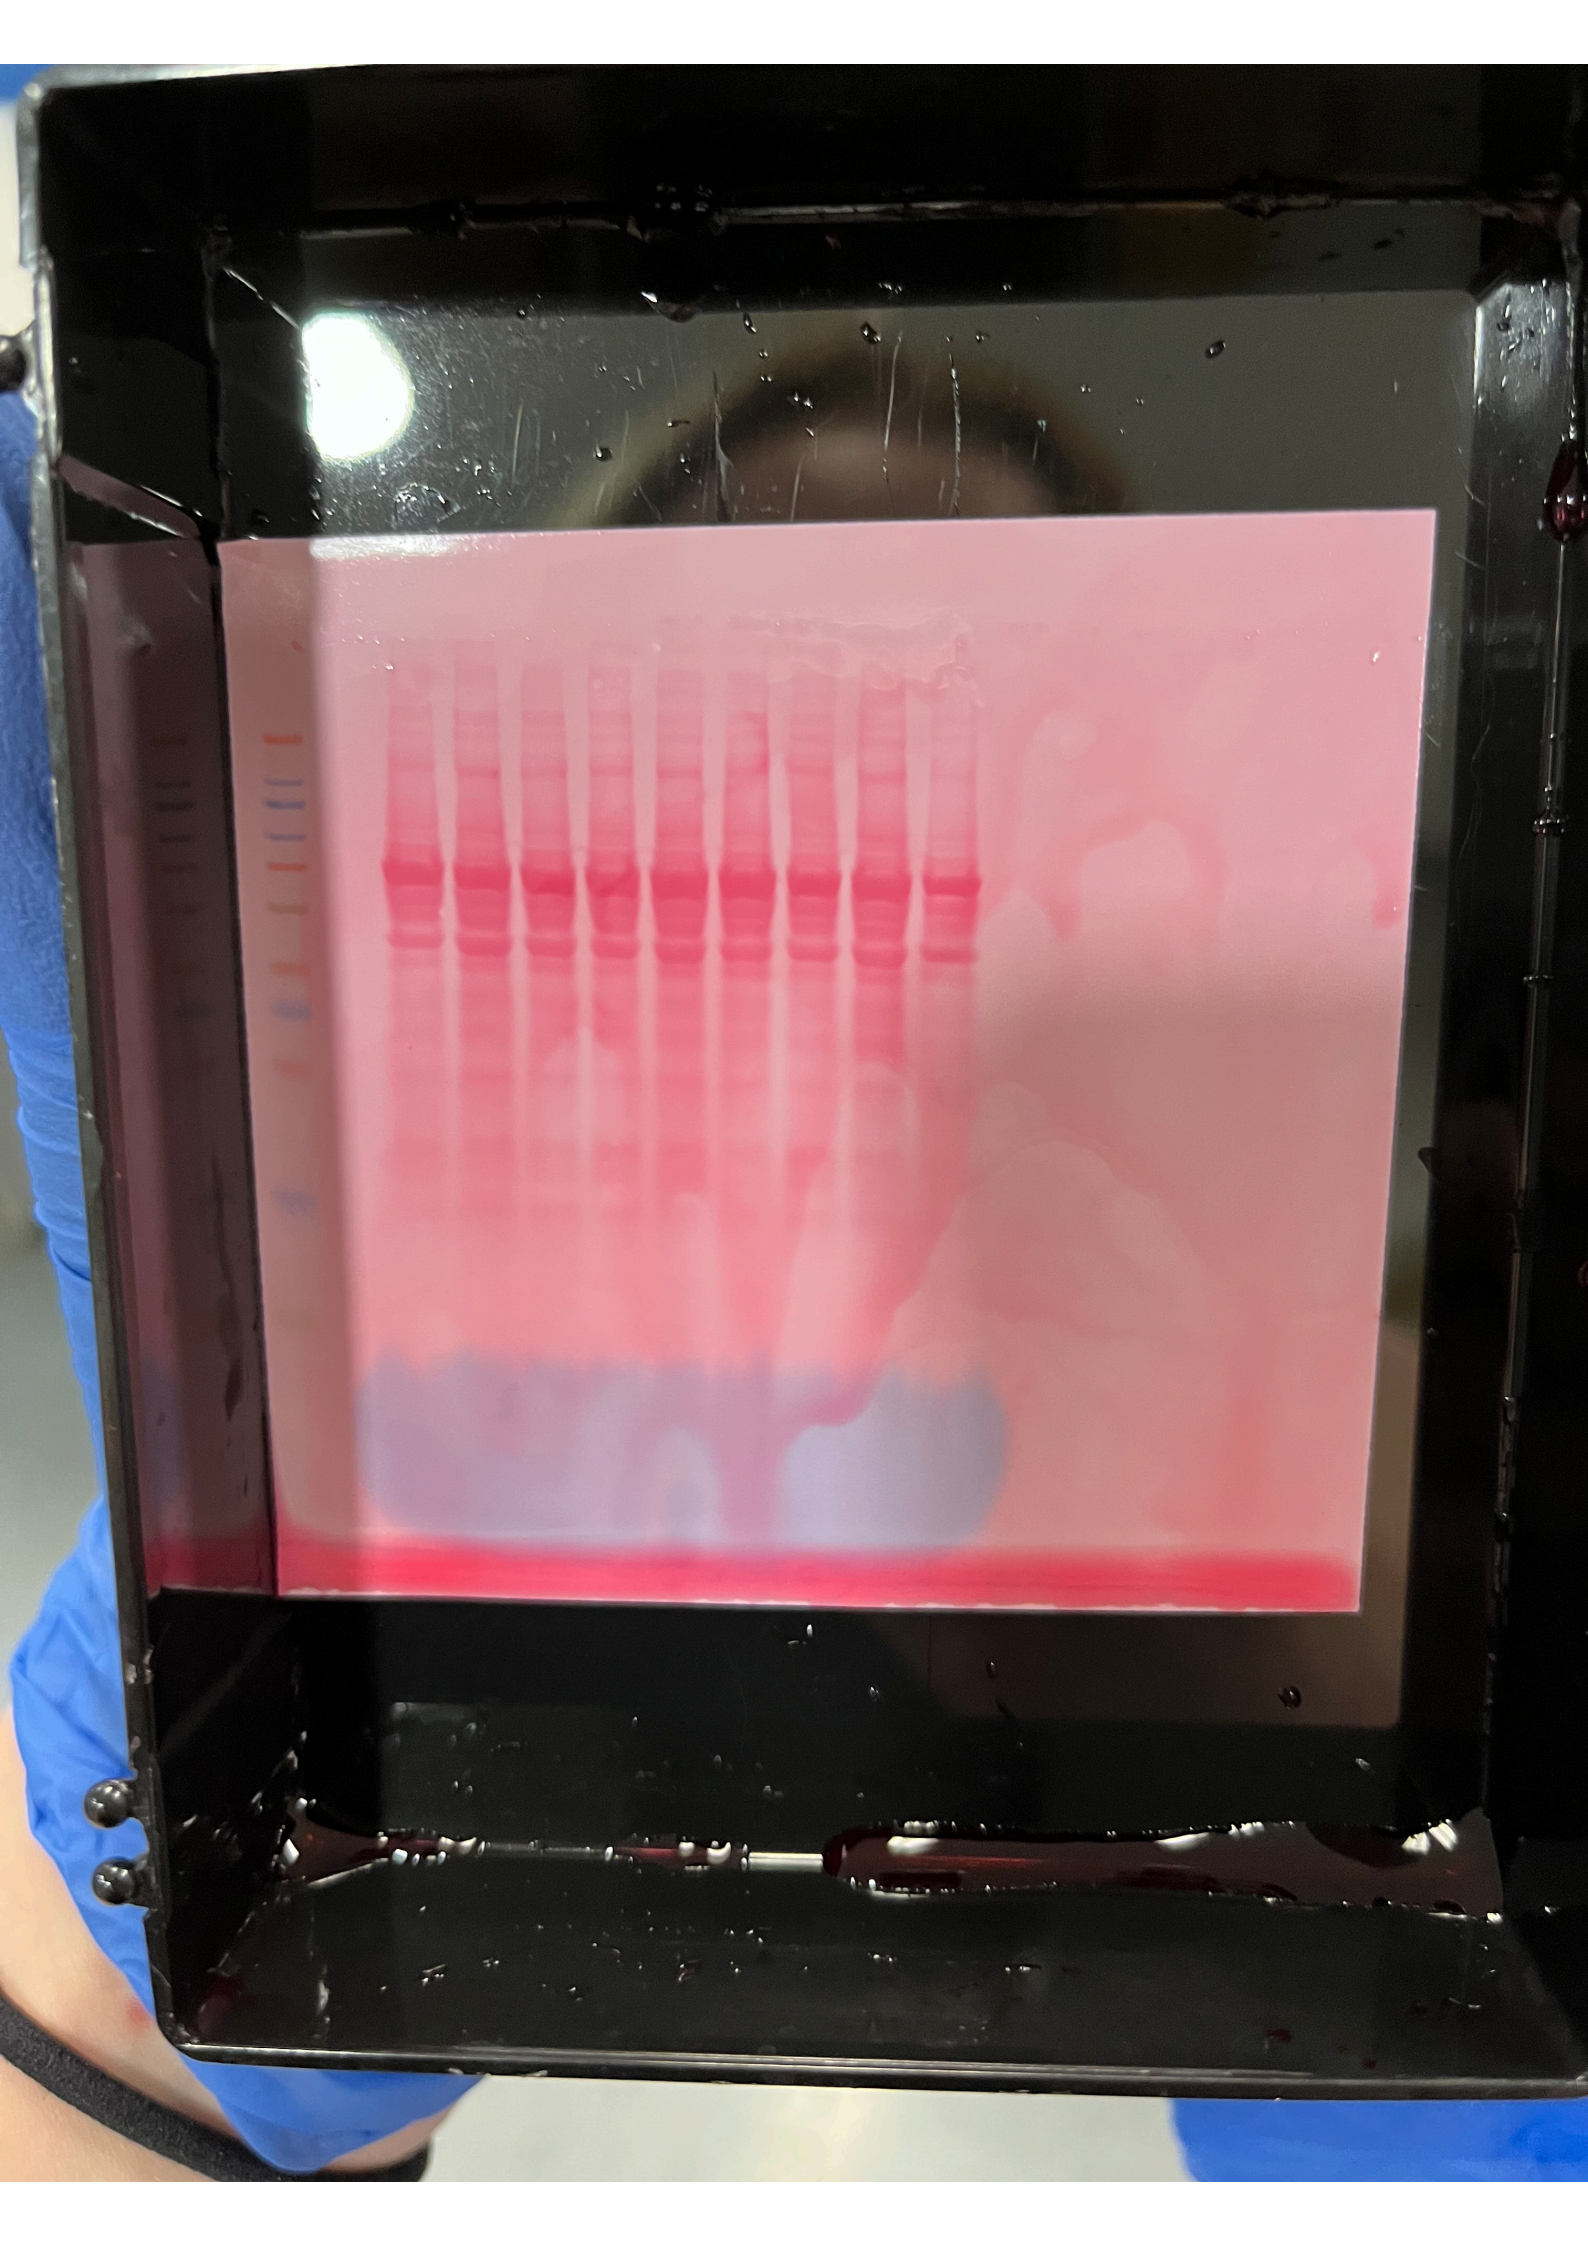

Supplement: supp [file elife-74690-supp-v1.zip]

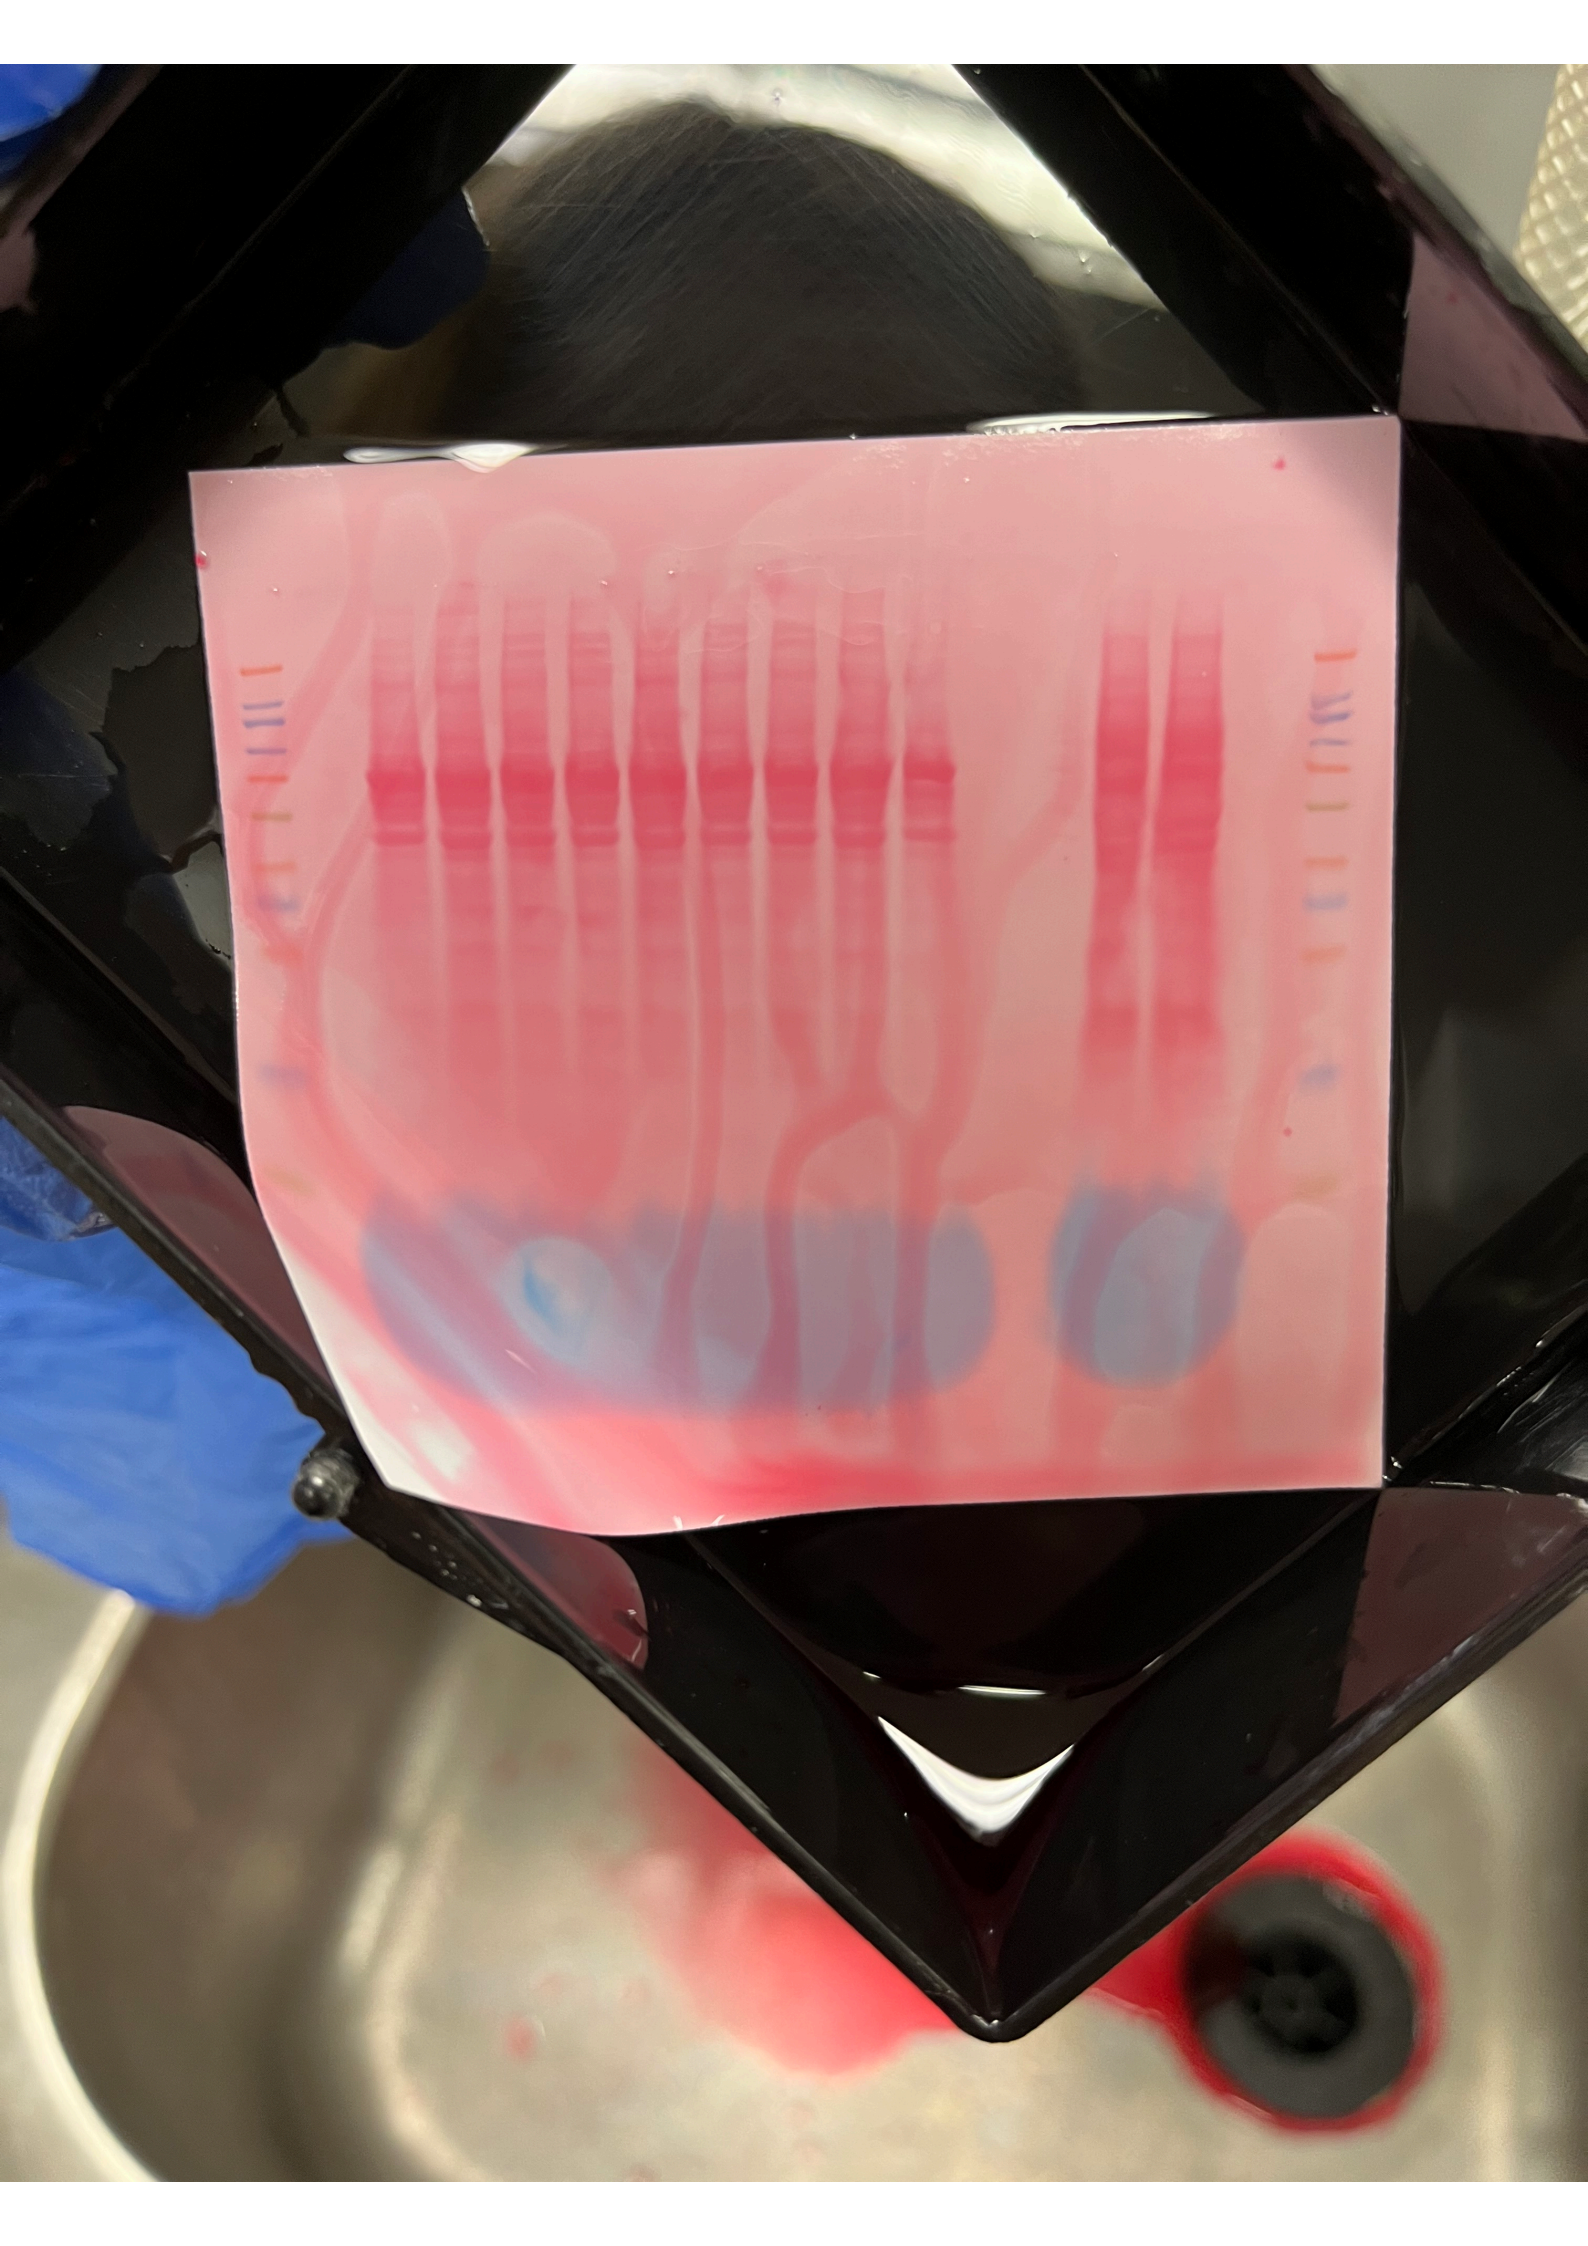

Supplement: supp [file elife-74690-supp-v1.zip]

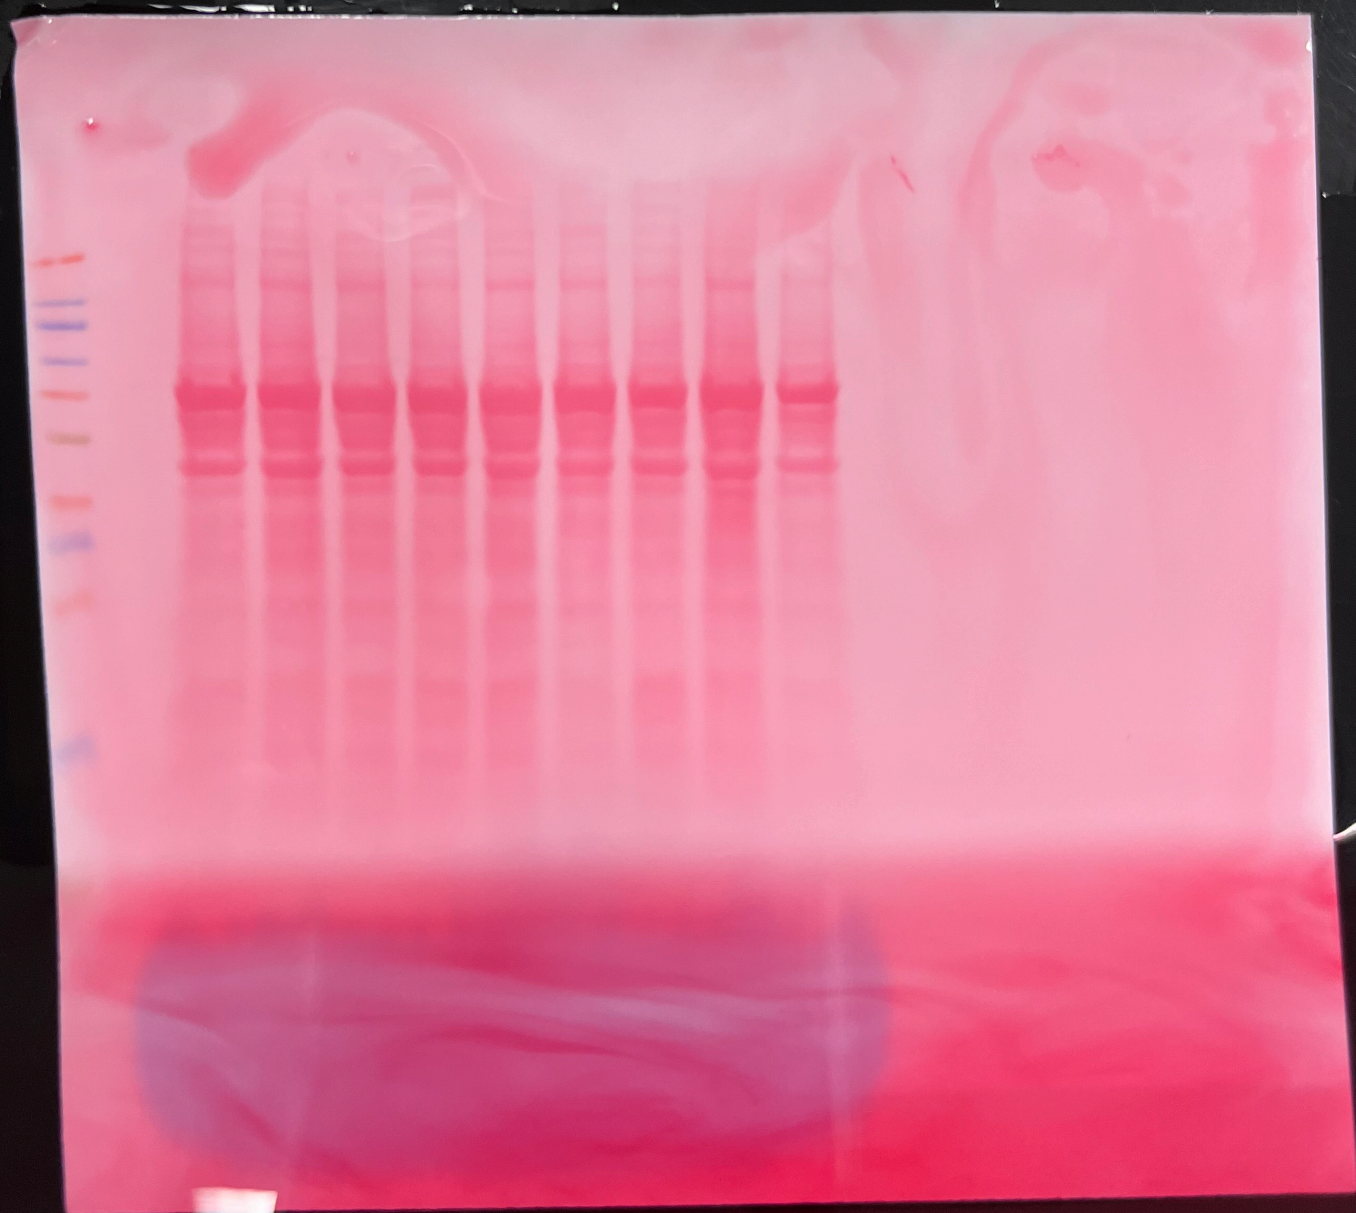

Supplement: supp [file elife-74690-supp-v1.zip]
